# Supplementary material
Source: publisher figshare collection journal article supplement (https://future-science-group.figshare.com/ndownloader/files/33020816)
Supplement: Supplementary file 1 [file 33020816]

## Sheet: Sheet1
Supplementary Table 3 - P value
gene	YTHDC1	YTHDC2	YTHDF1	YTHDF2	YTHDF3	IGF2BP1	IGF2BP2	IGF2BP3	HNRNPA2B1	HNRNPC	RBMX	METTL3	METTL14	WTAP	RBM15	RBM15B	VIRMA	ZC3H13	FTO	ALKBH5
pvalue	1.06e-84	2.8e-36	1.06e-256	0	1.58e-39	3.98e-286	0	0	0	2.68e-180	1.19e-99	1.44e-47	3.8e-116	8.5e-63	0	1.57e-197	7.11e-149	2.05e-81	0	1.34e-105
